# Supplementary material
Source: Elsevier journal article supplement (https://www.sciencedirect.com/science/article/pii/S0300289614004591)
Supplement: mmc1 [file S0300289614004591:mmc1.pdf]

## **Análisis de marcadores biológicos en el Proyecto Estratégico de Cáncer de Pulmón CIBERES - RTIC Cáncer - SEPAR**

Eduard Monsó, Luis M. Montuenga, Julio Sánchez de Cos, Cristina Villena, por el Grupo Colaborativo en Cáncer de Pulmón CIBERES- RTICC– SEPAR – Plataforma Biobanco Pulmonar.

### **Material suplementario**

#### **Variables clínicas**

La información clínica obtenida en el momento basal está conformada por datos sociodemográficos, de exposición al tabaco, antecedentes laborales, las variables clínicas (incluyendo comorbilidades), analíticas, radiológicas (tomografía computarizada y por emisión de positrones) y funcionales del paciente. Asimismo, se registran las variables de caracterización del tumor que forman parte del proyecto de Estadificación TNM de la IASLC, que incluyen preguntas de, localización, diagnóstico, estirpe y diferenciación tumoral, tratamiento y, una descripción detallada y exhaustiva de los descriptores T, N y M, incluyendo aspectos morfológicos como la afectación vascular, linfática y del tejido circundante (1,2). En lo referente al seguimiento del paciente, se recoge información sobre recidiva y mortalidad: a) tiempo libre de enfermedad; b) tipo de recaída (locoregional o metastásica); c) supervivencia global; y d) supervivencia relacionada con la enfermedad. Las causas de muerte se registran como: a) muerte por recurrencia locoregional del NSCLC; b) muerte

por metástasis de NSCLC; c) muerte por a) y b); d) muerte por un segundo tumor primario; e) muerte por otras causas; y e) muerte por causas no determinadas.

## **MicroRNAs**

De los cortes de tejido parafinado se extrae el ARN mediante el kit miRNeasy FFPE de AMBION (Applied Biosystems), y mediante la técnica de PCR a tiempo real (RT-PCR) se analizan los perfiles de expresión de los miRNAs de interés. Se incluyen también en el estudio “*small miRNAs*” endógenos para la normalización de los datos. Se compara el perfil de expresión de miRNAs de los dos grupos de pacientes extremos, pacientes con recaída precoz respecto y pacientes libres de enfermedad, y el perfil de expresión de miRNAs de la muestra tumoral con la del tejido no tumoral del mismo paciente, para identificar los miRNAs que se asocian a enfermedad activa y a peor pronóstico.

## **Vía metabólica de las pentosas fosfato**

En el Proyecto se analizarán, mediante técnicas inmunohistoquímicas, los niveles de expresión de TKT, TKTL1 y G6PD. La tinción se cuantificará mediante análisis de imagen computacional, que calcula la relación entre la intensidad relativa de la tinción y el área de la imagen, interpolando los resultados en una curva de calibración trazada con una escala de grises (3). Finalmente, las posibles correlaciones entre expresión enzimática, crecimiento

local y agresividad serán evaluadas considerando la clasificación TNM y los niveles enzimáticos medidos.

### **Marcadores inflamatorios**

Para cuantificar los niveles de los distintos antígenos, se captarán las imágenes correspondientes a cada uno de los antígenos a 400 aumentos mediante la utilización de una cámara fotográfica conectada a un equipo de microscopía óptica, que serán almacenadas para posterior cuantificación antigénica. Los infiltrados inflamatorios se cuantificarán de forma individual para cada una de las muestras, y, paralelamente, se medirán las áreas ocupadas por dichos infiltrados, comparando los resultados obtenidos en los subgrupos creados (tipo tumoral, tejido sano adyacente y tejido de transición) (4). Se cuantificarán asimismo los niveles totales de células inflamatorias (macrófagos y leucocitos) por área total de tejido pulmonar analizado(4–6). Las imágenes de las tinciones de los antígenos moleculares se cuantificarán mediante la utilización de un procedimiento específico (*histo-score*) en el que se establece una escala de colores según las intensidades de las tinciones (7). A cada intensidad se le asigna un valor numérico (*score*), correspondiendo la suma de todos los *scores* obtenidos para dicha muestra a la intensidad final para una muestra biológica determinada. Así, se comparan las intensidades entre los subgrupos de muestras, con el fin de examinar sus diferencias. De este modo, la detección de antígenos de una forma meramente cualitativa puede ser cuantificada a partir de la creación de una escala semi-cuantitativa, que permite realizar análisis estadísticos de mayor fiabilidad.

### **Marcadores de actividad estromal**

Para cada tinción se tomarán al menos 10 imágenes aleatorizadas por muestra, y se analizarán con *Image J*. Las células mesenquimales del estroma se determinarán mediante análisis morfométrico. El porcentaje de células mesenquimales del estroma positivas para  $\alpha$ -SMA+, VIM+ o DES+ en cada subtipo tumoral se realizará mediante conteo manual doble-ciego por 2 observadores independientes, según descrito (8). El porcentaje de tejido positivo para colágeno o tenascina se determinará binarizando las imágenes y calculando el porcentaje de área positiva para cada marcador.

### **Metilación del ADN**

A partir de ADN extraído del tejido tumoral, se efectuará una modificación química con bisulfito de sodio. Este tratamiento transforma las citosinas no metiladas en uracilos, mientras que las citosinas metiladas se mantienen inalteradas. Se utilizará esta diferencia de secuencia para establecer el estado de metilación de los cinco genes citados mediante *Methylation-Sensitive High Resolution Melting* (MS-HRM).

### **Respuesta inflamatoria en sangre periférica**

En el Proyecto se determinarán PCR y fibrinógeno por nefelometría; IL-6, IL-8, IL-10, TNF- $\alpha$ , IFN- $\gamma$ : por ELISA ultrasensible; y la actividad antioxidante, carbonilos y nitrotirosinas, por ELISA.

## Referencias

1. Sánchez de Cos Escuín J, Serra Mitjans M, Hernández Hernández J, Hernández Rodríguez H. Registro del Grupo Cooperativo de Cáncer de Pulmón-II de la Sociedad Española de Neumología y Cirugía Torácica. Estudio descriptivo. Arch Bronconeumol. 2013;49:462-7.
2. Giroux DJ, Rami-Porta R, Chansky K, Crowley JJ, Groome PA, Postmus PE, et al. The IASLC Lung Cancer Staging Project: data elements for the prospective project. J Thorac Oncol Off Publ Int Assoc Study Lung Cancer. 2009;4:679-83.
3. Diaz-Moralli S, Tarrado-Castellarnau M, Alenda C, Castells A, Cascante M. Transketolase-like 1 expression is modulated during colorectal cancer progression and metastasis formation. PloS One. 2011;6(9):e25323.
4. Marín-Corral J, Martínez-Caro L, Lorente JA, de Paula M, Pijuan L, Nin N, et al. Redox balance and cellular inflammation in the diaphragm, limb muscles, and lungs of mechanically ventilated rats. Anesthesiology. 2010;112:384-94.
5. Barreiro E, Ferrer D, Sanchez F, Minguella J, Marin-Corral J, Martinez-Llorens J, et al. Inflammatory cells and apoptosis in respiratory and limb

muscles of patients with COPD. *J Appl Physiol Bethesda Md* 1985.  
2011;11:808-17.

6. Barreiro E, Peinado VI, Galdiz JB, Ferrer E, Marin-Corral J, Sánchez F, et al. Cigarette smoke-induced oxidative stress: A role in chronic obstructive pulmonary disease skeletal muscle dysfunction. *Am J Respir Crit Care Med*. 2010;182:477-88.
7. McCarty KS, Miller LS, Cox EB, Konrath J, McCarty KS. Estrogen receptor analyses. Correlation of biochemical and immunohistochemical methods using monoclonal antireceptor antibodies. *Arch Pathol Lab Med*. 1985;109:716-21.
8. Marin-Corral J, Fontes CC, Pascual-Guardia S, Sanchez F, Olivan M, Argilés JM, et al. Redox balance and carbonylated proteins in limb and heart muscles of cachectic rats. *Antioxid Redox Signal*. 2010;12:365-80.

## **Tabla 1.- Protocolos de procesamiento de la Plataforma Biobanco Pulmonar**

### **1.- Muestras histológicas**

#### **1.1- Optimización ácidos nucleicos**

- a. Colocar una fracción de la pieza en un recipiente plano con 5ml de RNA later®.
- b. Obtener fragmentos de 0,2x0,2x0,2 cm.
- c. Sumergir de 5 a 10 fragmentos en cada criotubo con 0,5ml de solución RNA later®.
- d. Incubar 24h a 4°C.
- e. Almacenar a -20°C.

#### **1.2.- Optimización proteómica**

- a. Con una fracción de la pieza obtener fragmentos de 0,3x0,3x0,3 cm.
- b. Colocar los fragmentos en PBS o solución salina preenfriada a 4°C en recipiente estéril.
- c. Lavar 3 veces en PBS o solución salina pre-enfriada, en agitación 3-4 min o estática 10 min.
- d. Secar en papel de filtro.
- e. Colocar 1-3 fragmentos en la pared de un criotubo sin que estén en contacto.
- f. Congelar en nitrógeno líquido o en baño de isopentano y almacenar a -80°C.

#### **1.3.- Histología-parafina**

- a. Colocar fragmento de 1x1x0,2 cm en un recipiente con solución salina preenfriada a 4°C.
- b. Lavar 3 veces en PBS o solución salina pre-enfriada, en agitación 3-4 min o estática 10 min.

- c. Colocar el fragmento en Formaldehido 3,5-4%, tamponado a pH=7 con carbonatos 24-48h.
- d. Cortar fragmentos de 3-5mm<sup>3</sup> de tejido pulmonar fijado bajo una campana extractora.
- e. Deshidratar y aclarar el tejido.
- f. Parafinar con parafina de bajo punto de fusión.

#### **1.4.- Histología-no parafina**

- a. Colocar fragmento de 1x1x0,2 cm en recipiente con solución salina preenfriada a 4°C.
- b. Lavar 3 veces en PBS o solución salina pre-enfriada, en agitación 3-4 min o estática 10 min.
- c. Colocar fragmento en 5-10 ml PBS-paraformaldehido 4% pre-enfriado e incubar 24h a 4°C.
- d. Dividir en 3 e incluir en OCT.

#### **1.5.- Corte histológico y optimización proteómica**

- a. De una porción de la pieza obtener fragmentos de 0,3x0,3x0,3 cm con una tijera.
- b. Colocar los fragmentos en PBS o solución salina preenfriada a 4°C en recipiente estéril.
- c. Lavar 3 veces en PBS o solución salina pre-enfriada en agitación 3-4 min o estática 10 min.
- d. Secar en papel de filtro.
- e. Colocar capa de OCT en criomolde, colocar fragmento y rellenar el criomolde con OCT.
- f. Congelar en HISTOBATH/baño maría de isopentano con nitrógeno líquido y almacenar -80°C.

### **2.- Muestras de sangre periférica**

#### **2.1.- Sangre total**



- a. Venopuncionar y recoger sangre en tubo con aditivo anticoagulante EDTA-K2E o EDTA-K3.
- b. Girar suavemente el tubo 8-10 veces.
- c. Llevar inmediatamente al laboratorio, alicuotar 0,5 ml por criovial estéril y etiquetar.
- d. Almacenar inmediatamente a -80°C.

## **2.2.- Suero**

- a. Venopuncionar y recoger sangre en tubo con aditivo coagulante SST II y gel (> 8ml).
- b. Girar suavemente el tubo 5 veces.
- c. Centrifugar 1500g durante 15 minutos a temperatura ambiente.
- d. Recoger el suero sanguíneo tras la centrifugación,
- e. Alicuotar 0,5ml del suero sanguíneo en cada uno de los crioviales estériles, y etiquetar.
- f. Almacenar inmediatamente a -80°C.

## **2.3.- Plasma**

- a. Venopuncionar y recoger sangre en tubo con aditivo anticoagulante EDTA-K2E/K3E (>6 ml).
- b. Girar suavemente el tubo 8-10 veces.
- c. Centrifugar 1500g durante 15 minutos a temperatura ambiente.
- d. Recoger el plasma sanguíneo tras la centrifugación
- e. Alicuotar 0,5ml en cada uno de los crioviales estériles, y etiquetar
- f. Almacenar inmediatamente a -80°C.
